# Supplementary material for: MoImd4 mediates crosstalk between MoPdeH‐cAMP signalling and purine metabolism to govern growth and pathogenicity in Magnaporthe oryzae
Source: PubMed Central journal article supplement (PMC6422694; doi:10.1111/mpp.12770), 2019-01-11

A

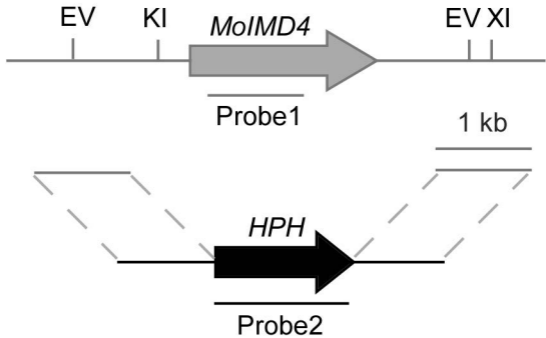

B

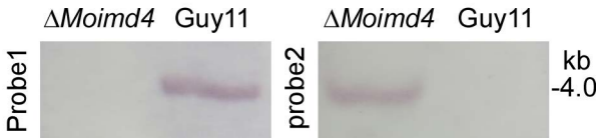

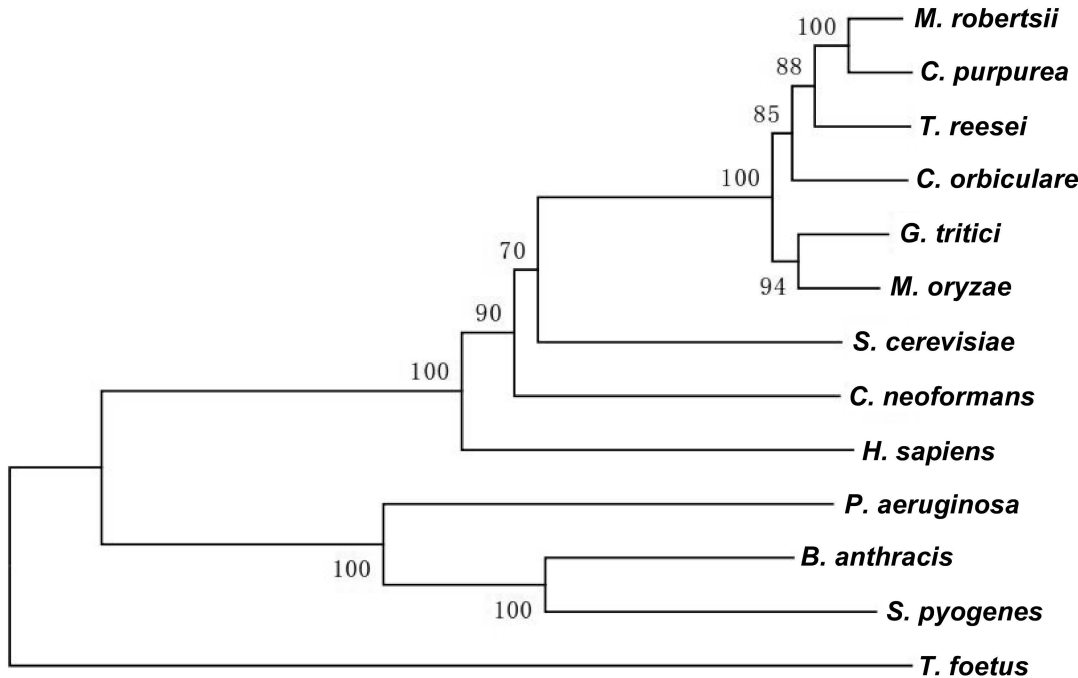

0.1

**A****Guy11** **$\Delta$ Moimd4****MoImd4****CM**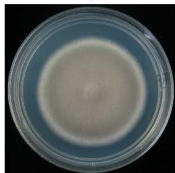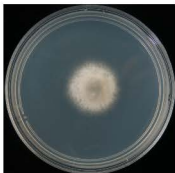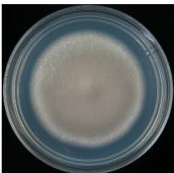**MM**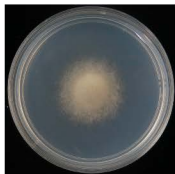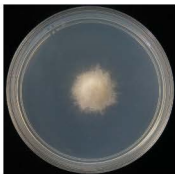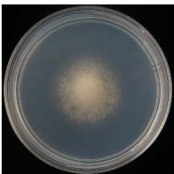**SDC**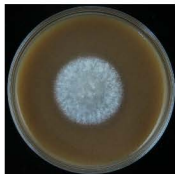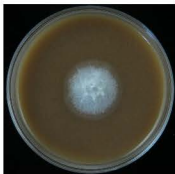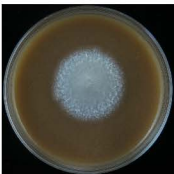**OM**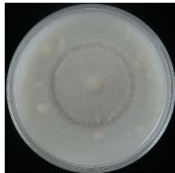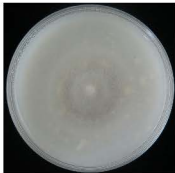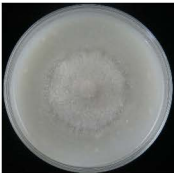**B****Guy11** **$\Delta$ Moimd4****MoImd4**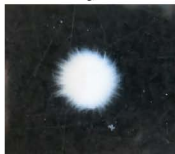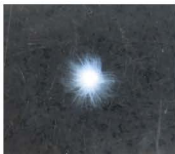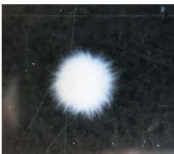

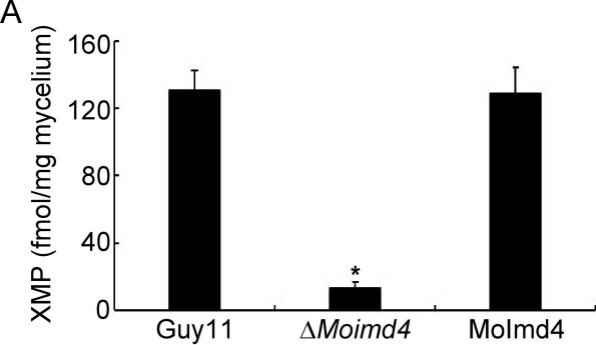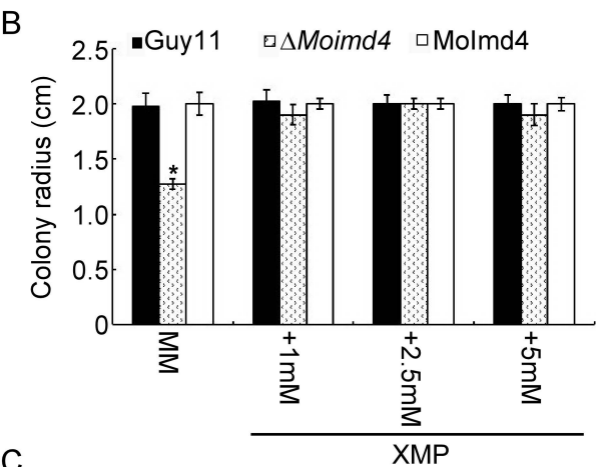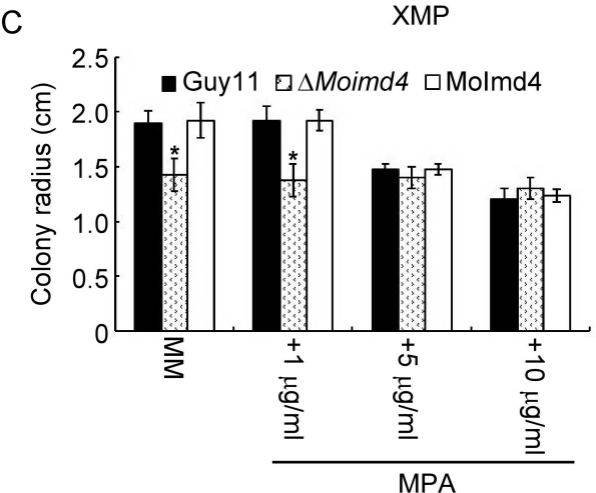

A

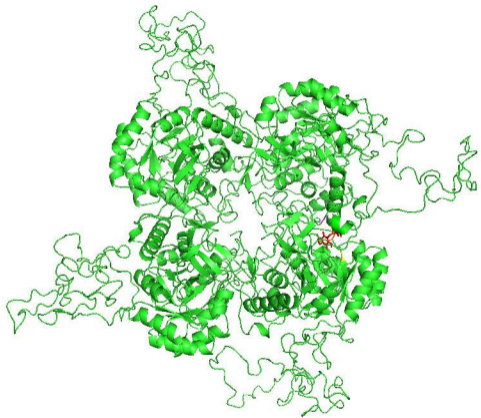

B

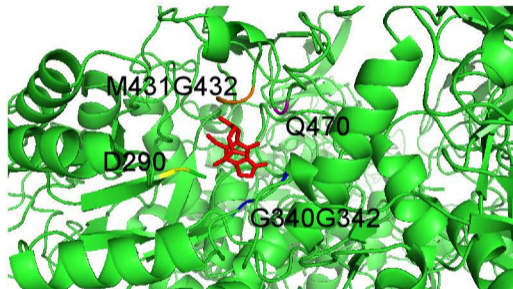

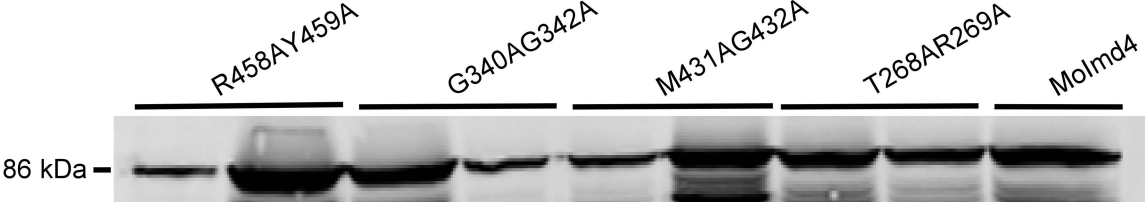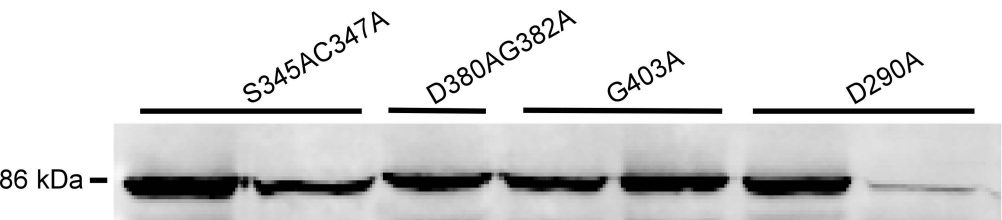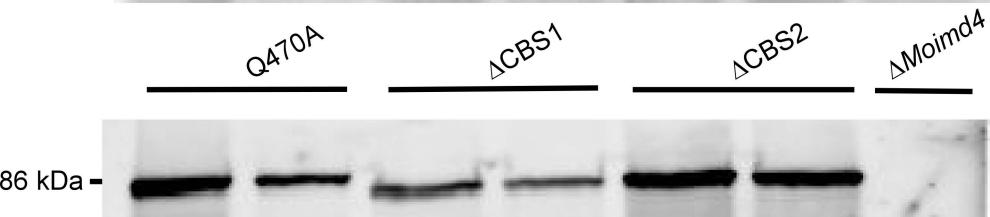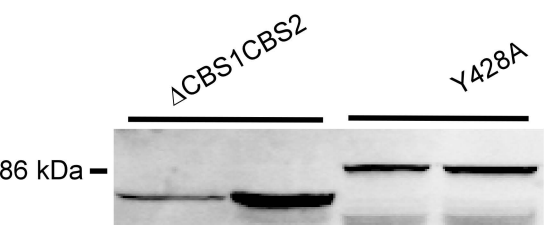

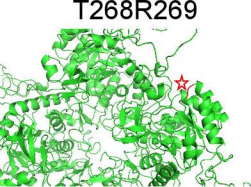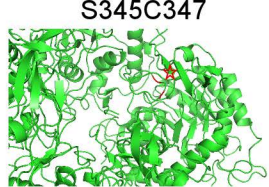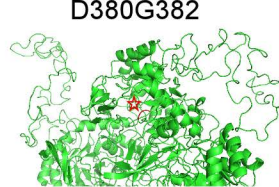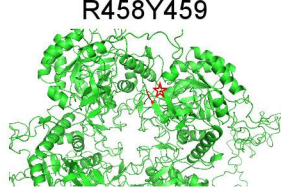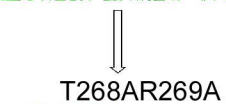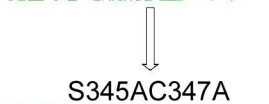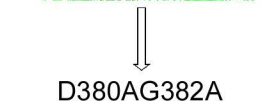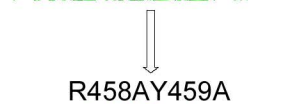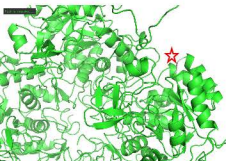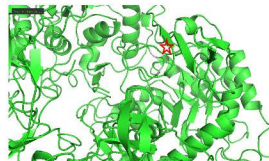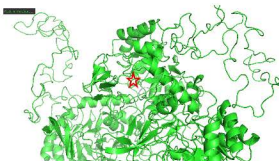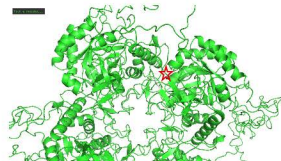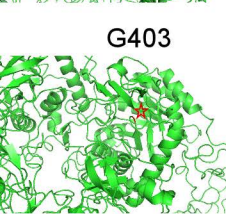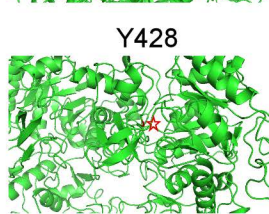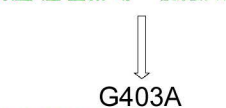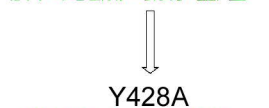

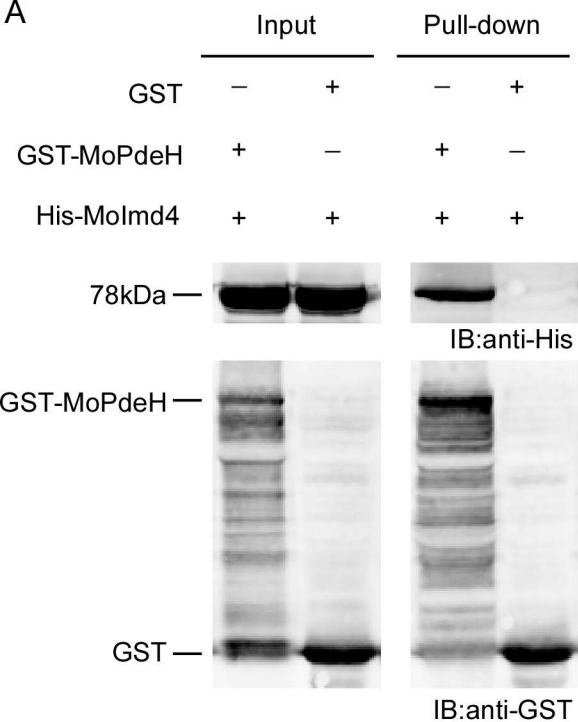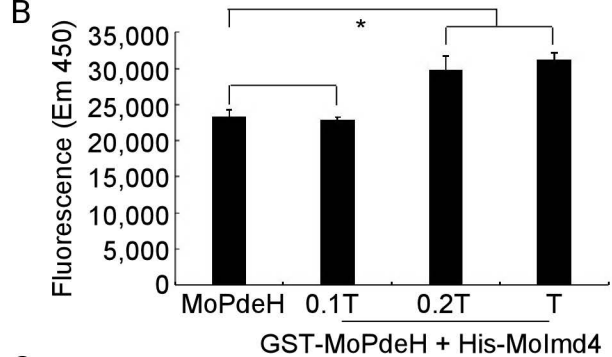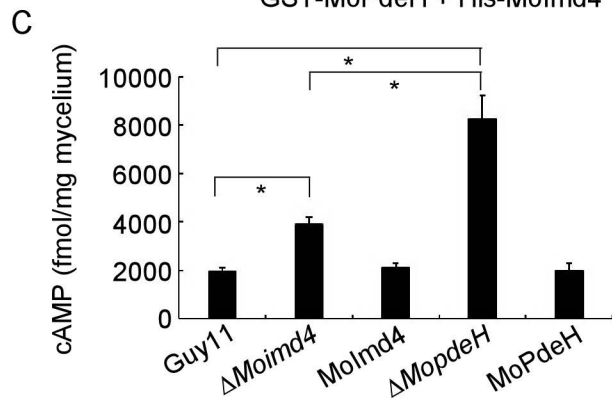



A

Guy11

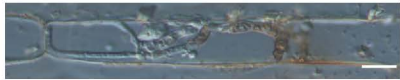 $\Delta Moimd4$ 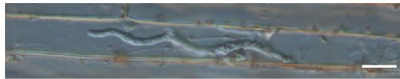

MoImd4

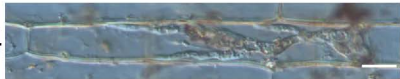

B

Infected cells stained by DAB (%)

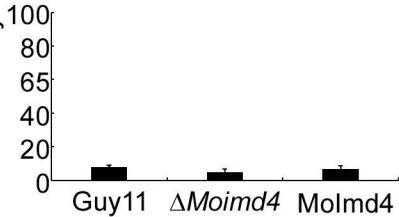

Spore

IH

DIC

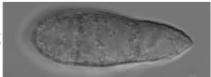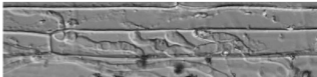

GFP

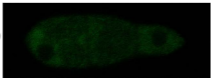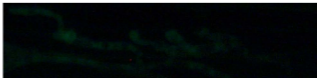

Merge

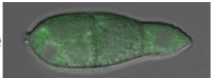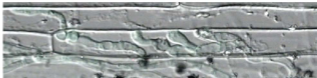

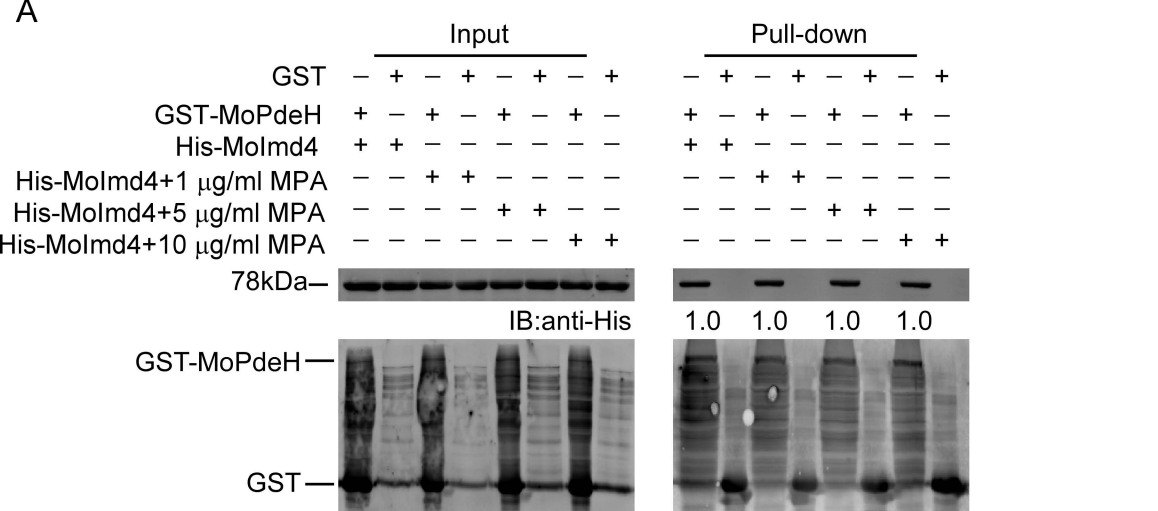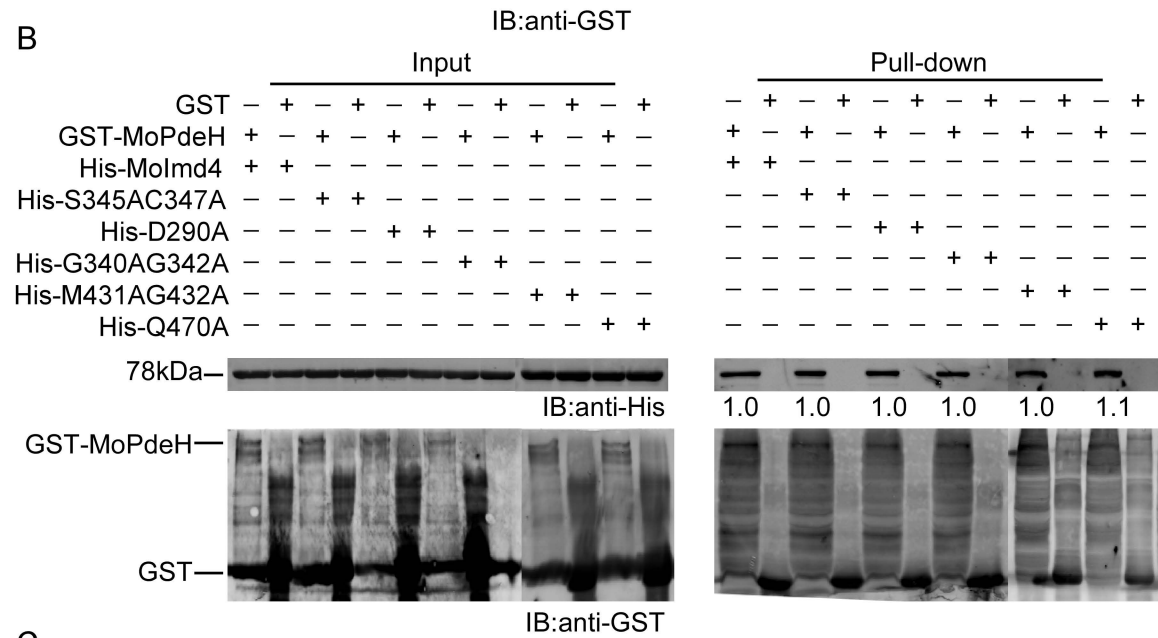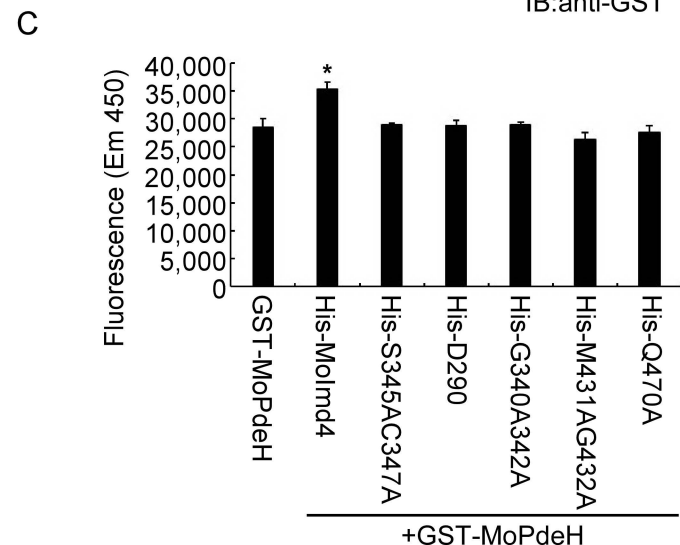

# OsIMPDH

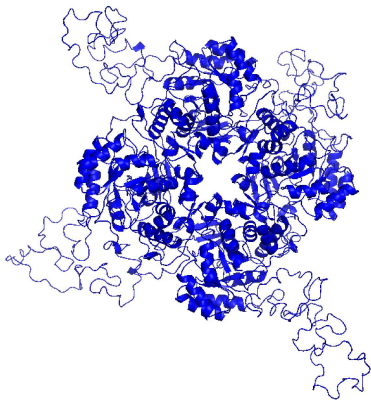

Supplement: NIHMS997448-supplement-supp_FigS1-12.pdf [file NIHMS997448-supplement-supp_FigS1-12.pdf]
